# Supplementary material for: A Novel Class of Human ADAM8 Inhibitory Antibodies for Treatment of Triple-Negative Breast Cancer
Source: MDPI journal article supplement (doi:10.3390/pharmaceutics16040536), 2024-04-13
Supplement: s1 [file s1]

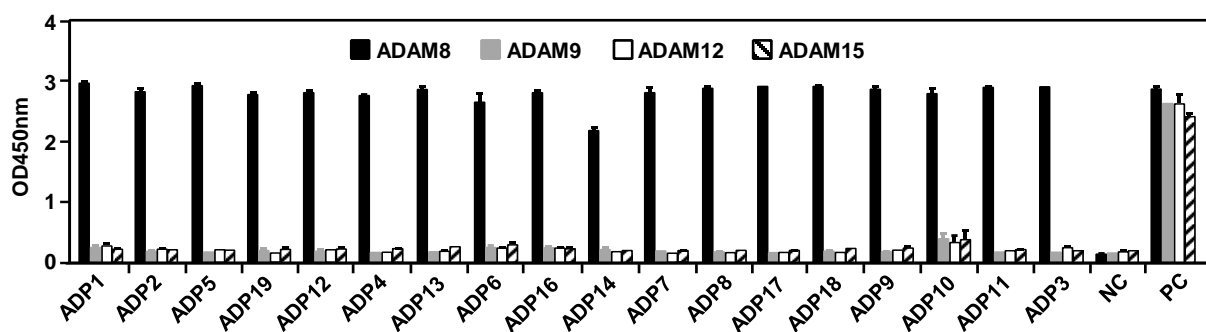

**Supplementary Figure S1.** ADPs selectively bind ADAM8. ELISAs were performed using recombinant human proteins of ADAM8 closely related ADAM9, ADAM12 or ADAM15 proteins to assess cross-reactivity. Normal mouse IgG was used as negative control (NC); a test bleed sample from a recombinant human ADAM8 (rHuADAM8) injected mouse was used as a positive control (PC).

| Epitope | Ab    | ADP10 | ADP17 | ADP18 | ADP19 | ADP11 | ADP8 | ADP5 | ADP13 | ADP2 | ADP1 | ADP12 | ADP7 | ADP9 | ADP6 | ADP4 | ADP3 | ADP16 | ADP14 |
|---------|-------|-------|-------|-------|-------|-------|------|------|-------|------|------|-------|------|------|------|------|------|-------|-------|
| 1       | ADP10 | 91%   | 90%   | 88%   | 82%   | 91%   | 90%  | 59%  | 44%   | 24%  | 26%  | 16%   | 37%  | 47%  | 68%  | 49%  | 14%  | 45%   | -13%  |
|         | ADP17 | 90%   | 93%   | 88%   | 90%   | 94%   | 92%  | 45%  | 65%   | 36%  | 52%  | 42%   | 47%  | 57%  | 63%  | 53%  | 32%  | 35%   | -26%  |
|         | ADP18 | 91%   | 94%   | 90%   | 89%   | 94%   | 91%  | 32%  | 49%   | 30%  | 21%  | 13%   | 34%  | 50%  | 60%  | 46%  | 7%   | 45%   | -29%  |
|         | ADP19 | 90%   | 93%   | 91%   | 88%   | 92%   | 92%  | 79%  | 37%   | -4%  | 16%  | 3%    | 26%  | 31%  | 34%  | 33%  | 0%   | 25%   | -24%  |
|         | ADP11 | 91%   | 93%   | 90%   | 88%   | 94%   | 92%  | 82%  | 47%   | 10%  | -3%  | 9%    | 48%  | 50%  | 46%  | 24%  | 3%   | 37%   | 5%    |
|         | ADP8  | 92%   | 92%   | 88%   | 84%   | 93%   | 91%  | 89%  | 44%   | 2%   | 8%   | 4%    | 17%  | 37%  | 42%  | 20%  | 6%   | 25%   | -27%  |
| 2       | ADP5  | 91%   | 93%   | 92%   | 86%   | 94%   | 94%  | 81%  | 54%   | 14%  | 26%  | 5%    | 42%  | 22%  | 37%  | 33%  | 4%   | 54%   | -30%  |
|         | ADP13 | 52%   | 56%   | 23%   | 66%   | 27%   | 46%  | 27%  | 92%   | 86%  | 80%  | 89%   | -9%  | -3%  | 19%  | 47%  | 3%   | 12%   | -18%  |
| 3       | ADP2  | 26%   | 26%   | 11%   | 10%   | 13%   | 11%  | 1%   | 94%   | 91%  | 83%  | 90%   | 91%  | 85%  | 93%  | 94%  | 93%  | 41%   | -10%  |
|         | ADP1  | 24%   | 7%    | 12%   | 6%    | 13%   | 9%   | 3%   | 89%   | 91%  | 78%  | 90%   | 88%  | 85%  | 94%  | 95%  | 95%  | 34%   | 1%    |
|         | ADP12 | 31%   | 18%   | 7%    | 42%   | 6%    | 6%   | -17% | 94%   | 90%  | 85%  | 90%   | 83%  | 79%  | 85%  | 89%  | 80%  | 22%   | -25%  |
|         | ADP7  | 64%   | 61%   | 40%   | 48%   | 54%   | 48%  | 87%  | 33%   | 66%  | 77%  | 60%   | 87%  | 83%  | 91%  | 88%  | 73%  | 86%   | -29%  |
|         | ADP9  | 58%   | 61%   | 34%   | 49%   | 39%   | 42%  | 68%  | 52%   | 81%  | 83%  | 79%   | 88%  | 84%  | 87%  | 89%  | 84%  | 90%   | -30%  |
|         | ADP6  | 40%   | 38%   | 17%   | 57%   | 16%   | 30%  | -5%  | 22%   | 76%  | 76%  | 69%   | 89%  | 84%  | 93%  | 95%  | 78%  | 87%   | 6%    |
|         | ADP4  | 35%   | 35%   | 9%    | 28%   | 11%   | 25%  | 3%   | 32%   | 61%  | 76%  | 53%   | 85%  | 82%  | 91%  | 92%  | 66%  | 84%   | -25%  |
| 4       | ADP3  | 34%   | 16%   | 15%   | 15%   | 15%   | -1%  | 6%   | 31%   | 89%  | 80%  | 89%   | 89%  | 87%  | 93%  | 92%  | 93%  | 89%   | 6%    |
|         | ADP16 | 35%   | 7%    | 7%    | 26%   | 12%   | -2%  | -3%  | 47%   | 43%  | 56%  | 34%   | 79%  | 81%  | 89%  | 86%  | 72%  | 88%   | -7%   |
| 5       | ADP14 | 46%   | 32%   | 19%   | 39%   | 27%   | 6%   | 15%  | 40%   | 40%  | 62%  | 13%   | 60%  | 70%  | 83%  | 76%  | 57%  | 20%   | 82%   |

**Supplementary Figure S2.** ADPs have 5 epitope clusters on the ectodomain of ADAM8. Epitope binning was performed using competitive ELISA. The binding of each ADP [indicated in the “Ab” column] to rHuADAM8 was challenged with excess of a second competitor ADP (indicated in the top row of the table). Percentages indicate extent of cross-competition for ADAM8. High levels of cross-competition, defined as equal to or greater than 75% (marked by the darker green shades), were used to delineate epitope clusters on ADAM8 for ADP binding. White boxes are the values obtained for competition with self.

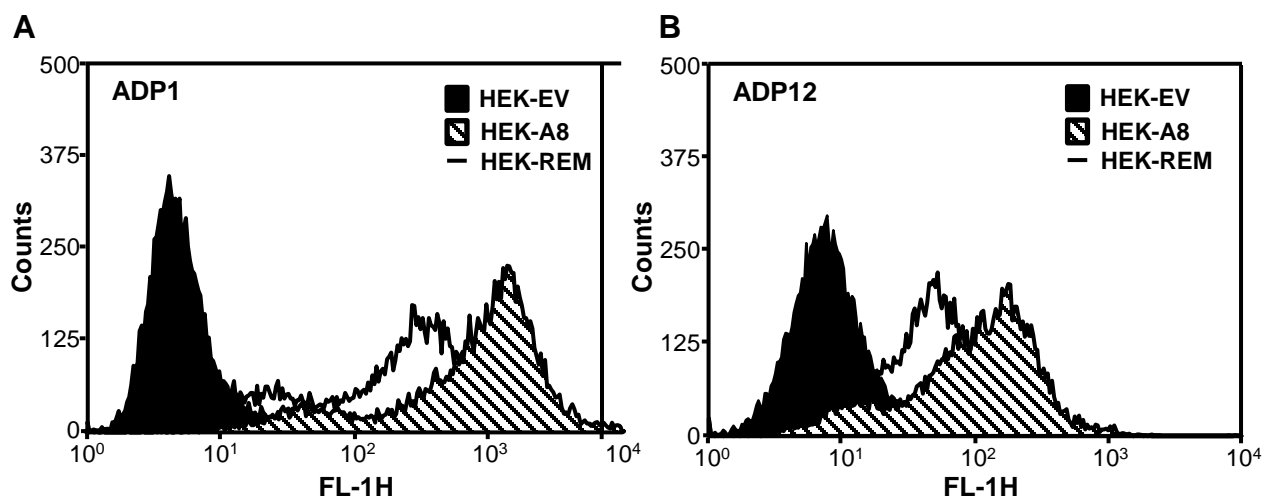

**Supplementary Figure S3.** Epitope 3 Abs ADP1 and ADP12 bind to both full-length and Remnant ADAM8. HEK293 cells stably transfected with a plasmid expressing full-length ADAM8 (HEK-A8), a deletion construct which generates the Remnant form, lacking the PRO and MP domains (HEK-REM) or empty vector control DNA (HEK-EV) were stained with ADP1 (A) or ADP12 (B), and subjected to flow cytometry. Representative histograms are shown.

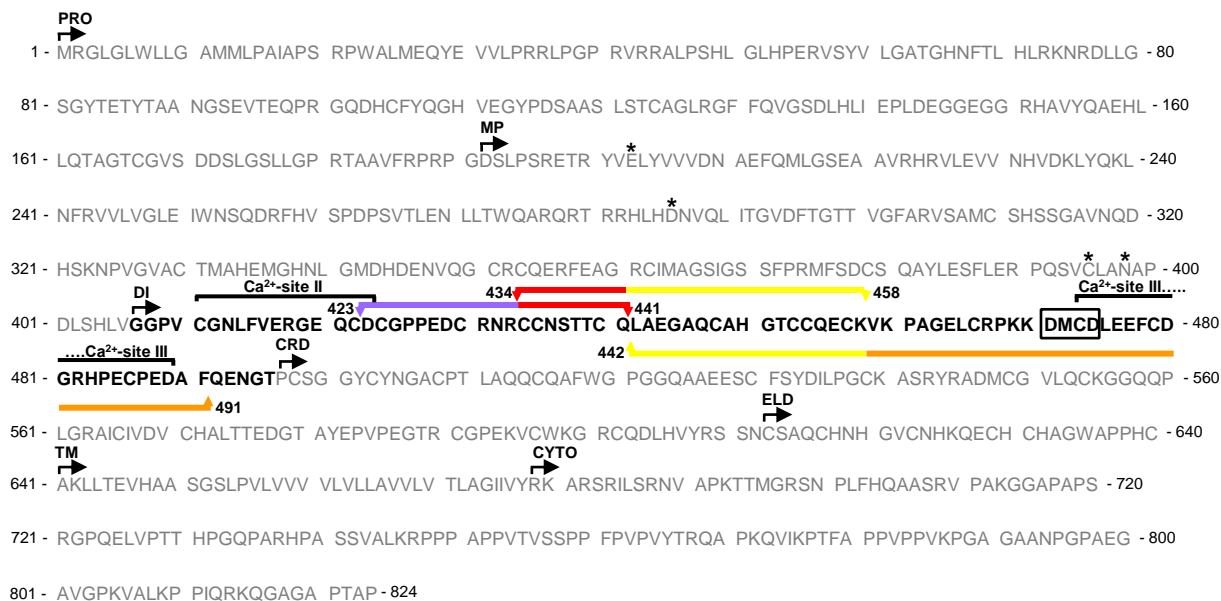

| ADAM8 DOMAIN:                      |                                | ADP DEUTERIUM REDUCTION SITE: |         |
|------------------------------------|--------------------------------|-------------------------------|---------|
| PRO - Prodomain [AA1-191]          | CRD- Cysteine-rich [AA497-612] | ADP3                          | 423 441 |
| MP - Metalloproteinase [AA192-406] | ELD - EGF-like [AA613-640]     | ADP2                          | 434 458 |
| DI - Disintegrin [AA407-496]       | TM - Transmembrane [AA641-678] | ADP13                         | 442 491 |
|                                    | CYTO - Cytoplasmic [AA679-824] |                               |         |

**Supplementary Figure S4.** Diagram of the human ADAM8 sequence with its domain regions indicating the epitopes of ADP2, ADP3 and ADP13 binding within the DI, at the peptide level as identified by HDX-MS. Calcium ion binding site I (involving 4 starred AAs in the MP), and sites II and III in the DI are as indicated. The integrin binding sequence (DMCD, AA471-474, open box), stabilized by disulfide bonds and calcium binding to adjacent site III, is shown. The human ADAM8 GenBank number is AAI15405.1.

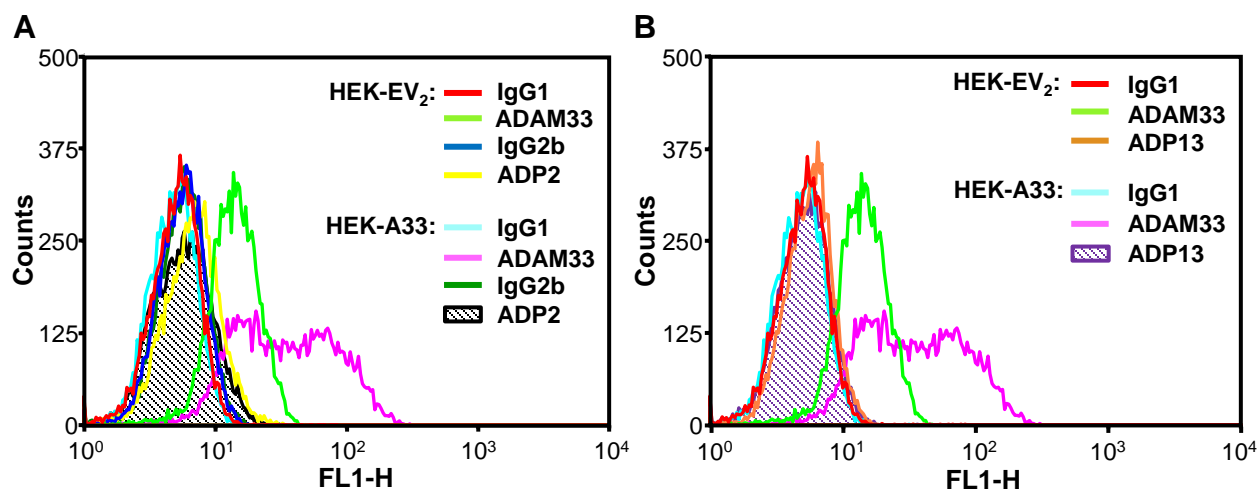

**Supplementary Figure S5.** ADP2 and ADP13 do not cross-react with ADAM33. HEK293 cells transiently transfected with a plasmid expressing ADAM8 related protein ADAM33 (HEK-A33) or empty vector control DNA (HEK-EV<sub>2</sub>) were stained with ADP2 (**A**) or ADP13 (**B**), following permeabilization to access the cytoplasmically localized ADAM33, and subjected to flow cytometry. An ADAM33 Ab was used as a positive control and appropriate isotype-matched IgGs as negative controls. Representative histograms are shown.
